# Supplementary material for: Effect of a Fracture Liaison Service on the Rate of Subsequent Fracture Among Patients With a Fragility Fracture in the Norwegian Capture the Fracture Initiative (NoFRACT): A Trial Protocol
Source: PubMed Central journal article supplement (PMC6324344; doi:10.1001/jamanetworkopen.2018.5701), 2018-12-07
Supplement: jamanetwopen-1-e185701-s001.pdf [file jamanetwopen-1-e185701-s001.pdf]

# 1 NoFRACT - Norwegian Capture the Fracture Initiative

## 2 1. Relevance relative to the call for proposals

3 *Bone fragility is a major public health problem due to the accompanying increased morbidity,*  
4 *mortality and financial cost as a result of fractures. The increase in life expectancy of the*  
5 *population means that the annual number of fractures and associated costs are expected to increase*  
6 *by 50% between 2005 and 2050. Despite the high economic cost to society and personal cost to*  
7 *affected individuals, fracture prevention in Norway is suboptimal, as many patients do not receive*  
8 *available and efficient therapy. A prior fragility fracture almost doubles a patient's risk for a future*  
9 *fracture and multiple fractures increase the risk up to five fold. Still, the majority of fragility*  
10 *fracture patients are neither assessed, nor treated for osteoporosis. In Norway, as in many other*  
11 *countries there is a large care gap leaving millions of fracture patients at serious risk of future*  
12 *fractures. A fracture liaison service model of care is recommended, but data on its effectiveness is*  
13 *scarce. "Norwegian Capture the Fracture Initiative", is a cross-regional cooperative project based*  
14 *on initiatives of several hospital departments and universities, which aims at closing this gap by*  
15 *improving secondary fracture prevention. By introducing a standardized intervention program for*  
16 *assessment and treatment of fracture patients, we expect to document reduced rates of fractures and*  
17 *fracture related mortality. Seven Norwegian hospitals are randomized for the starting date of the*  
18 *study in a Stepped Wedge Cluster Randomized Controlled Trial design. The effect of the*  
19 *intervention will be measured based on endpoints from national registers. Each hospital will act as*  
20 *their own control, and endpoints will be compared before and after the intervention.*

## 21 2. Aspects relating to the research project

22 The main aim is to assess the effectiveness of introducing a standardized intervention program  
23 for treatment of fragility fracture patients, on the fracture rates and mortality across regions of  
24 Norway.

### 26 2.1. Background and status of knowledge

27  
28 *Epidemiology of fragility fractures*  
29 Bone fragility is a global health problem, and for largely unknown reasons Norway has the highest  
30 rates of fractures in the world.<sup>(1;2)</sup> As the population ages, the annual number of fractures and  
31 associated costs are expected to increase by 50% between 2005 and 2050.<sup>(3;4)</sup> If hip fracture rates in

32 Norway remain constant the burden is expected to double towards 2040.<sup>(5)</sup> Women and men above  
33 50 years of age have a remaining lifetime risk of fractures of 46% and 22%, respectively.<sup>(6)</sup> Fragility  
34 fractures are associated with a substantial burden of morbidity as pain, loss of function, disability,  
35 hospitalization, and long-term nursing care.<sup>(7;8)</sup> In Europe, about 2.7 million fragility fractures occur  
36 every year in men and women, and the direct annual cost of this is estimated to EUR 36 billion.<sup>(9)</sup>  
37 Despite the high economic cost to society and personal cost to affected individuals, osteoporosis  
38 prevention is suboptimal, as many patients do not receive available and efficient therapy.<sup>(3)</sup> The  
39 anti-osteoporosis drugs are readily available and may reduce the risk for future fracture by 30-  
40 50%.<sup>(10;11)</sup>

41 In Norway, about 10 000 subjects over 50 years of age suffer a hip fracture every year,<sup>(12;13)</sup>  
42 and the annual number of forearm fractures is estimated to 15 000.<sup>(14;15)</sup> As hip fractures are  
43 estimated to constituted 20% of all osteoporotic fractures in Europe,<sup>(16)</sup> this would imply 50 000  
44 osteoporotic fractures annually in Norway, but exact number is lacking. Moreover, there is no good  
45 estimate of the total costs of osteoporotic fractures in Norway. Folkehelsemeldingen 2012/2013  
46 (report from the Norwegian government) refers to hip fractures as one of the most expensive  
47 diagnoses for the Norwegian health system, and the total costs during the first year after a hip  
48 fracture is estimated to NOK 500.000.<sup>(17)</sup> In Sweden, the annual costs related to fractures were  
49 estimated to SEK 5.6 billion.<sup>(18)</sup> Acute treatment in hospital accounted for 1/3 and public services as  
50 nursing homes accounted for 2/3 of the total costs. Including quality-adjusted life-years (QALYs)  
51 lost; the annual societal burden of fragility fractures in Sweden of SEK 15.2 billion in 2005 is  
52 expected to increase by 56 % to 26.3 billion in 2050.<sup>(18)</sup>

53

#### 54 ***The pathogenesis and clinical significance of bone fragility***

55 The pathogenesis of fractures is multifactorial; genetics, trauma mechanism, falls and bone strength  
56 are all important factors.<sup>(19)</sup> Women suffer more fractures than men, particularly postmenopausal  
57 women, but the risk of recurrent hip fracture is similar given similar remaining life expectancy.<sup>(13)</sup>  
58 However, compared to women, men have higher mortality after a hip fracture,<sup>(20)</sup> and the 1-year  
59 excess mortality post hip fracture was 2.8 and 4.6 increased in women and men, respectively.<sup>(21)</sup>  
60 One year after a hip fracture, one of four patients over 50 years of age were no longer alive.

61

#### 62 ***Assessment and treatment of persons at high risk of fracture***

63 Measurement of femoral neck bone mineral density (BMD) by dual energy X-ray absorptiometry  
64 (DXA) is the most common approach used to assess fracture risk and is considered the gold  
65 standard surrogate for bone strength.<sup>(22;23)</sup> However, although a lower BMD is associated with  
66 increased risk of fracture, most people with fractures do not have osteoporosis (T score of 2.5 or

67 more standard deviations (SD) below the young normal mean) but osteopenia or normal BMD.<sup>(23;24)</sup>  
68 To address this lack of sensitivity, Fracture Risk Assessment Tool (FRAX) is developed, which  
69 calculates the 10-years probability of a major osteoporotic fracture based on clinical risk factors as  
70 age, height, weight, smoking, excessive alcohol intake, previous fracture, parental history of hip  
71 fracture, glucocorticoid therapy, rheumatoid arthritis and femoral neck BMD.<sup>(25-27)</sup> Whereas Garvan  
72 nomograms are based on age, BMD, prior fracture and prior falls.<sup>(28)</sup> These tools are easy available  
73 online. A prior fragility fracture almost doubles a patient's future fracture risk and multiple  
74 fractures increase the risk up to five fold.<sup>(29)</sup> About 75% of re-fractures occur within five years after  
75 a first hip fracture.<sup>(30)</sup> Unfortunately, in Norway, few patients have a DXA scan done; only 14.6%  
76 of women and 4.2% of men receive anti-osteoporosis drugs after a hip fracture,<sup>(31)</sup> and only 20%  
77 and 35% of patients with osteoporosis aged 60-69 and 70-79 years, respectively.<sup>(32)</sup>

78

### 79 *Fracture liaison services*

80 A fracture liaison service (FLS) model of care is a systematic approach to secondary fracture  
81 prevention, including a dedicated coordinating nurse.<sup>(33)</sup> After Glasgow University Teaching  
82 Hospitals introduced FLS in 1999, the hip fracture rate was reduced by 7.3%, while at the same  
83 time, the rate increased by 17% in England. Per 1000 patients assessed by the FLS, 18 new  
84 fractures were prevented, which included 11 hip fractures.<sup>(34)</sup> Likewise, Kaiser Permanente  
85 introduced The Healthy Bone Program in Southern California, USA in 2001. In 2006 actuarial  
86 analyses expected 2510 hip fractures, but only 1575 hip fractures were observed, indicating a  
87 decrease in hip fracture rate by 37%.<sup>(35)</sup> This led to a cost-reduction of USD 30.8 million in 2006.<sup>(35)</sup>  
88 The Academic Hospital of Maastricht employed a coordinating nurse in 2005, which increased the  
89 number of DXA scans compared with the surrounding hospitals.<sup>(36)</sup> The Concord Repatriation  
90 General Hospital, Sydney established their Minimal Trauma Fracture Liaison Service in 2005.  
91 Patients involved in the program had 80% lower incidence of new fractures than controls.<sup>(37)</sup> At  
92 Skåne University Hospital in Lund, Sweden the risk of new fractures was reduced by 42% after  
93 introduction of osteoporosis assessment of patients with fragility fractures (wrist, shoulder,  
94 vertebral, or hip fracture), and mortality after fractures was slightly reduced.<sup>(38;39)</sup> However, most of  
95 these studies are relatively small, and robust data on the effectiveness of FLS is scarce. Thus, larger  
96 randomized controlled trials with fracture risk and mortality as primary end-points are needed.

97 There are no systematic routine or national guidelines in Norway pertaining to FLS, most  
98 patients with a fracture are not offered assessment and secondary fracture prevention. This may be  
99 due to lack of knowledge or interest for this topic among health professionals. Compliance and

100 resilience are additional challenges. This failure gives, however, an opportunity for a large-scale  
 101 evaluation of the effect and cost effectiveness of the FLS concept, which is very much in demand.  
 102

103 **2.2. Approaches, hypotheses and choice of method**

104 To solve these issues, initiatives are taken by several orthopedic surgeons, endocrinologists,  
 105 rheumatologists and scientists at seven small and large hospital departments and universities from  
 106 all four health regions in south-east, west, central and north of Norway, to collaborate on this  
 107 patient-oriented clinical research project. The population and total number of hip, wrist and  
 108 proximal humerus fractures in patients  $\geq 50$  years at each of each hospital in 2013 are shown below.  
 109

|                      | <b>Oslo<sup>a</sup></b> | <b>Bærum</b> | <b>Drammen</b> | <b>Bergen<sup>b</sup></b> | <b>Molde</b> | <b>St Olav</b> | <b>Tromsø</b> |
|----------------------|-------------------------|--------------|----------------|---------------------------|--------------|----------------|---------------|
| Population (in 1000) | <b>500</b>              | <b>180</b>   | <b>140</b>     | <b>500</b>                | <b>70</b>    | <b>300</b>     | <b>120</b>    |
| Hip                  | 600                     | 350          | 261            | 450                       | 123          | 402            | 180           |
| Forearm/wrist        | 950                     | 550          | 414            | 1000                      | 168          | 397            | 347           |
| Proximal humerus     | 590                     | 200          | 160            | 600                       | 68           | 197            | 88            |

110 <sup>a</sup>Oslo University Hospital including “Legevakta”, <sup>b</sup>Haukeland Hospital including “Legevakta”

111  
 112 This cross-regional cooperative project is a unique opportunity to measure the effect of introducing  
 113 a standardized intervention program, mainly in terms of possible changes in fracture rates and  
 114 fracture-associated excess mortality. The effect of this intervention will be measured based on  
 115 endpoints from national registers (as outlined below).  
 116

117 The main aim is to assess the effectiveness of introducing a standardized intervention program  
 118 for treatment of fragility fracture patients measured by changes in recurrent fracture rates and  
 119 mortality.

120  
 121 A fracture liaison service (FLS) model of care is widely recommended but data on its effectiveness  
 122 regarding recurrent fracture risk and fracture related mortality is scarce. We therefore aim to assess  
 123 the effectiveness of an intervention in terms of introducing a standardized program for assessment  
 124 and treatment of bone fragility in fracture patients. This FLS program will involve dedicated  
 125 coordinating nurses at each hospital, who will approach fracture patients, invite them to participate,  
 126 inform them about the importance of bone fragility, give lifestyle advice concerning physical  
 127 activity, healthy diet, moderate alcohol intake and smoking cessation, and offer assessment and  
 128 treatment for osteoporosis if needed. Seven hospitals are Stepped Wedge Cluster Randomized for

129 starting date of introducing a standardized intervention program from 2015 to 2016, with follow-up  
130 throughout 2019 (Fig. 1). The effect of the intervention will be measured based on endpoints from  
131 national registers. Main outcomes are recurrent fractures (hip, forearm and all fracture types) and  
132 post hip fracture mortality. Each hospital will act as its own controls, and provide endpoint data  
133 before and after intervention. In the analyses the effect of the standardized intervention program  
134 will be estimated by comparing data from before (2008-2014), and after the intervention (2015-  
135 2018).

136 We believe this project will generate new knowledge by providing evidence on how to improve  
137 patient care and reduce the accelerating fracture-related health care costs on health budgets by  
138 prevention of secondary fracture, reduce morbidity, mortality and improve quality of life.  
139 Moreover, this will enhance the health service's competence and quality and contribute to the  
140 development of new national guidelines and the health services delivered by hospitals.  
141 Interdisciplinary programs and clinical pathways to improve the care of patient groups have  
142 increased within the health services the past 20 years, and large scale evaluations of clinical effects  
143 and costs are needed.

144

#### 145 **Testable Research Questions and Hypotheses**

146 1. Incidence of forearm fractures and other low-energy fragility fractures at different hospitals and  
147 regions of Norway will be assessed in register data before intervention.

148 2. The incidence of fragility fractures (hip, proximal humerus and wrist) will be reduced at hospitals  
149 with a standardized intervention program compared to hospitals without.

150 3. The mortality rate after fragility fractures (hip, proximal humerus and wrist) will be reduced at  
151 hospitals with a standardized program compared to hospitals without.

152

#### 153 **Stepped Wedge Cluster Randomized Controlled Trial**

154 In this stepped wedge cluster randomized controlled trial, the hospitals are randomized for the order  
155 to start of the study. The intervention was planned to start at 4 months interval for 3 clusters  
156 (consisting of 2-3 hospitals, Fig. 1), until all 7 hospitals have received the intervention.  
157 Randomization was conducted 8 weeks prior to the start of the study, by the leaders of the  
158 Norwegian Osteoporosis Association, who are not involved as collaborators in the study:

159

160

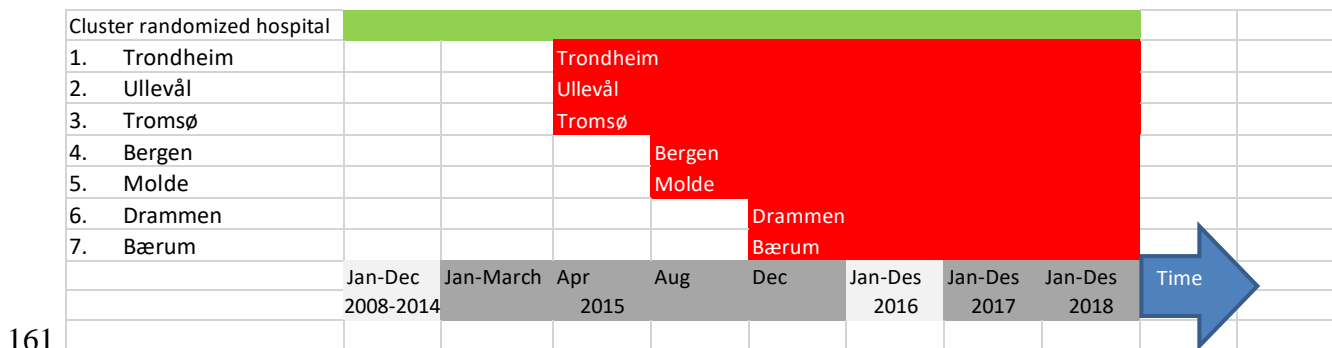

161  
162

163 **Fig. 1. Study design - stepped wedge cluster randomized controlled trial**

164 April 2015, St. Olavs hospital, Oslo University Hospital, University Hospital of North Norway,  
 165 Aug 2015: Haukeland University Hospital and Molde Hospital, December 2015: Drammen  
 166 Hospital and Bærum Hospital. However, this plan has been delayed by one month so starting time  
 167 points for each cluster was: May 2015, September 2015, and January 2016. St. Olavs hospital and  
 168 Oslo University Hospital started May 2015, Haukeland University Hospital and Molde Hospital  
 169 started September 2015, the University Hospital of North Norway started October 2015. Drammen  
 170 Hospital and Bærum Hospital are preparing to start January 2016. The recruitment phase of 3-3.5  
 171 years will last from the beginning of the study until end of December 2018, with the follow-up after  
 172 one year, during 3-3.5 years from May 2016-December 2019.

173 A stepped wedge design is similar to a crossover design in terms that the different clusters (groups  
 174 of hospitals) in turn switch from no standardized program (control) to standardized program but at  
 175 different time points. The clusters will cross over in only one direction.<sup>(40;41)</sup> Each hospital will be  
 176 their own control, and endpoints will be compared before and after the introduction of intervention.  
 177 This stepped wedge cluster randomization design is particular relevant where it would be  
 178 considered unethical to not deliver or retract the intervention when it is expected to do more good  
 179 than harm, as here where the intervention is expected to be included as a future standard routine.

180

181 **Standardized Intervention Program initiated from May 2015 (see Fig. 2 below)**

182 1. Women and men  $\geq 50$  years of age with a low-trauma vertebral or non-vertebral fracture (except  
 183 fingers, toes, face and skull) will be approached by the coordinating nurse, and offered information,  
 184 assessment, lifestyle advice and treatment for bone fragility, preferable while in-patient are at the  
 185 hospital, or as out-patients, within 6 weeks after the fracture (see algorithm Fig. 2). Lifestyle advice  
 186 about physical activity, fall prevention, healthy diet, smoking cessation and moderate alcohol  
 187 intake, will be given, and referral to fall prevention at the hospital or primary care if indicated.

188 Exclusion criteria will be age below 50 years and short life expectancy. The project nurse in  
 189 collaboration with the physician will perform individual assessment of eligibility.

190

| Inclusion criteria                  | Exclusion criteria                         |
|-------------------------------------|--------------------------------------------|
| ≥ 50 years and low-trauma fracture* | <50 years                                  |
|                                     | Fractures of skull, face, toes, or fingers |
|                                     | Short life expectancy                      |
|                                     | Patient refuses assessment or treatment    |

191 \*low-trauma fracture will be the key target group, however, sometimes it is difficult to tell whether  
 192 high-trauma or low-trauma is involved in the fracture event, thus high-trauma may also be included

193

194 2. Blood samples will be collected and serum assayed for 25-hydroxyvitamin D (25[OH]D) (using  
 195 mass spectrometry, LCMS-MS (Oslo, Drammen, Bergen and Tromsø), or using immunoassays  
 196 (Bærum, Molde and Trondheim)), calcium, parathyroid hormone (PTH) (Immulite 2000),  
 197 kreatinine (for estimation of glomerulous filtration rate (eGFR)) and thyroid-stimulating hormone  
 198 (TSH). These measurements are needed for individual treatment decision as shown below.

199

200 3. Bisphosphonates are contra-indicated if kidney function is reduced (eGFR ≤ 35 ml/min), and  
 201 drug of choice is anti-RANKL, if eGRF is ≤ 35 ml/min and > 20 ml/min. All fracture patients with  
 202 reduced kidney function (eGFR<35 ml/min), will be considered for treatment with Denosumab  
 203 except if eGFR <20 ml/min or any of the exclusion criteria are present. Regular monitoring of S-Ca  
 204 is required when treating patients with reduced kidney function. Whether patients with severe  
 205 kidney failure (dialytic or predialytic stage) or kidney transplantation can be treated with  
 206 Denosunab, but require careful consideration and individual assessment by a kidney specialist in  
 207 collaboration with an expert on osteoporosis treatment (e.g. endocrinologist or rheumatologist).

208

209 4. Patients with low serum levels of calcium will be treated with calcium and Vitamin D  
 210 supplementation for 2 weeks before anti-osteoporosis drug (AOD) treatment will be initiated.

211

212 5. Patients with elevated S-Ca and PTH > 15 will be referred to endocrinologist. Smaller deviations  
 213 in s-Ca and PTH will be followed by fasting blood samples after 2-4 weeks. Patients with  
 214 significant deviation in TSH will be referred to their GP for further investigation of thyroid  
 215 function.

216

217 6. Basic recommendation for supplementation is: 800 IU (20µg) vitamin D + 500-1000 mg calcium.

218

219 7. Hip fracture patients often have low levels of Vitamin D, and they will be recommended  
220 treatment with an initial dose of 100 000 IU Vitamin D x1 p.o. or i.im if their kidney functions is  
221 not reduced (eGRF > 35 ml/min). If they have reduced kidney function (eGRF  $\leq$  35 ml/min) a  
222 nephrologist will be consulted for the dosage of active vitamin D (kalsitriol, 1- $\alpha$ ,25-dihydroksy  
223 vitamin D<sub>3</sub>), calcium supplement and if there are any contraindications to AOD (high risk of renal  
224 osteodystrofia e.g.).

225  
226 8. BMD will be measured of both hip and spine, with morphometric assessment of vertebral  
227 fracture assessment on lateral x-ray (VFA) (Lunar Prodigy DXA, Madison, WI, USA) if possible.  
228 All will be offered a DXA scan at hospitals with DXA available (for BMD T-score or FRAX score  
229 calculation) except patients with dementia, difficulties laying on the back, or short life expectancy;  
230 they will not be scanned by DXA (but have treatment decision made based on clinical assessment  
231 and FRAX score calculated without BMD). At hospitals without DXA machine available, FRAX  
232 score will be calculated for all fracture patients without BMD measurements.

233  
234 9. Patients with fracture of the hip, vertebrae or 2 or more low-trauma fracture do not need DXA for  
235 treatment decision, however, a DXA scan for T-score or FRAX score calculation is needed for the  
236 decision about AOD treatment of patients with one other low-trauma fracture.

237  
238 10. Hip fracture patients will be recommended AOD regardless of FRAX or T-score, and they do  
239 not need any DXA scan or FRAX score for treatment decision. Drug of choice i) zoledronic acid 5  
240 mg iv x 1/year, to avoid compliance problem, ii) denosumab 60 mg sc/6 month to women > 75  
241 years of age if they are not able to use peroral treatment, or iii) alendronate 70 mg po x 1/week.

242  
243 11. Patients with vertebral fracture or  $\geq$  2 low-trauma fracture will similarly be recommended AOD  
244 treatment regardless of T-score or FRAX score, as outlined in the treatment algorithm below.

245 Drug of choice i) alendronate 70 mg po x 1/week, ii) zoledronic acid 5 mg iv x 1/year, or iii)  
246 denosumab 60 mg sc/6 month.

247  
248 12. For patients with one other low-trauma fracture; a DXA scan is recommended, and AOD  
249 treatment is recommended if T-score  $\leq$  -1.5 or FRAX score for major fracture  $\geq$  20%. If kidney  
250 function is normal, the first choice of AOD is alendronate 70 po/week, see treatment algorithm.

251  
252 13. Patients with spine or femoral neck T-scores  $\leq$  -3.5, > 2 severe vertebral fractures (> 40%  
253 compression), and those who suffer a second fracture while using AOD, will be referred for further  
254 examination by specialist at the hospital and teriparatide treatment will be considered.

255



256 14. AOD will be prescribed by a hospital physician involved in this project. All patients treated  
257 with AOD will be offered a follow-up phone call after 3 months by the nurse and a visit to talk with  
258 the nurse after 1 year, to improve the compliance and resilience.

259  
260 In brief, at all hospitals, the intervention is a standardized program involving a nurse and physician  
261 who offer information, assessment, and treatment if needed in the hospital setting as an integrated  
262 part of the fracture treatment. All patients included in this study, will be offered a follow-up  
263 appointment to talk with the nurse 1 year after the fracture. The study design is kept simple to make  
264 the project realistic and feasible, scientifically, organizationally, in relation to the use of resources.

265

**NoFRACT Treatment Program for women and men ≥ 50 years after low-trauma fracture**  
*NoFRACT Norwegian Capture the Fracture® Initiative*

- All hospital patients will be offered\***
- Optimal fracture treatment
  - Assessment of bone fragility using DXA scan and FRAX score with follow-up appointment
  - Treatment for bone fragility – lifestyle advice and anti-osteoporotic drug as outlined in this program
  - Blood samples
  - Fall prevention, e.g. consider referral to physio- or ergotherapist and/or fall out-patient clinic
- \*All patients will be approached after a vertebral or any non-vertebral fracture (except fractures of fingers, toes, face and skull). Patients with dementia, difficulties laying on the back, or short life expectancy will not be offered DXA and FRAX score can be assessed without BMD. At hospitals without DXA, FRAX score can be assessed without BMD  
 (FRAX available: <http://www.shef.ac.uk/FRAX/tool.aspx?country=42>)

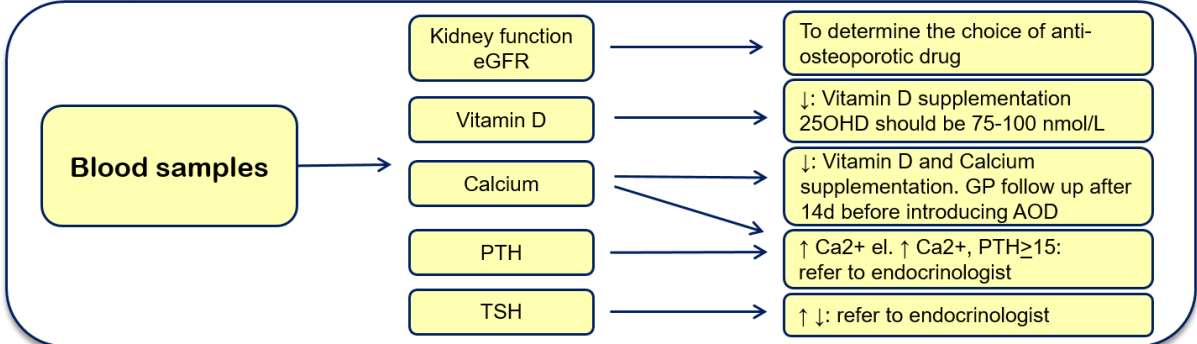

266

*All fracture patients will be offered DXA\*, lifestyle advices and recommended Vitamin D and Calcium suppl.*

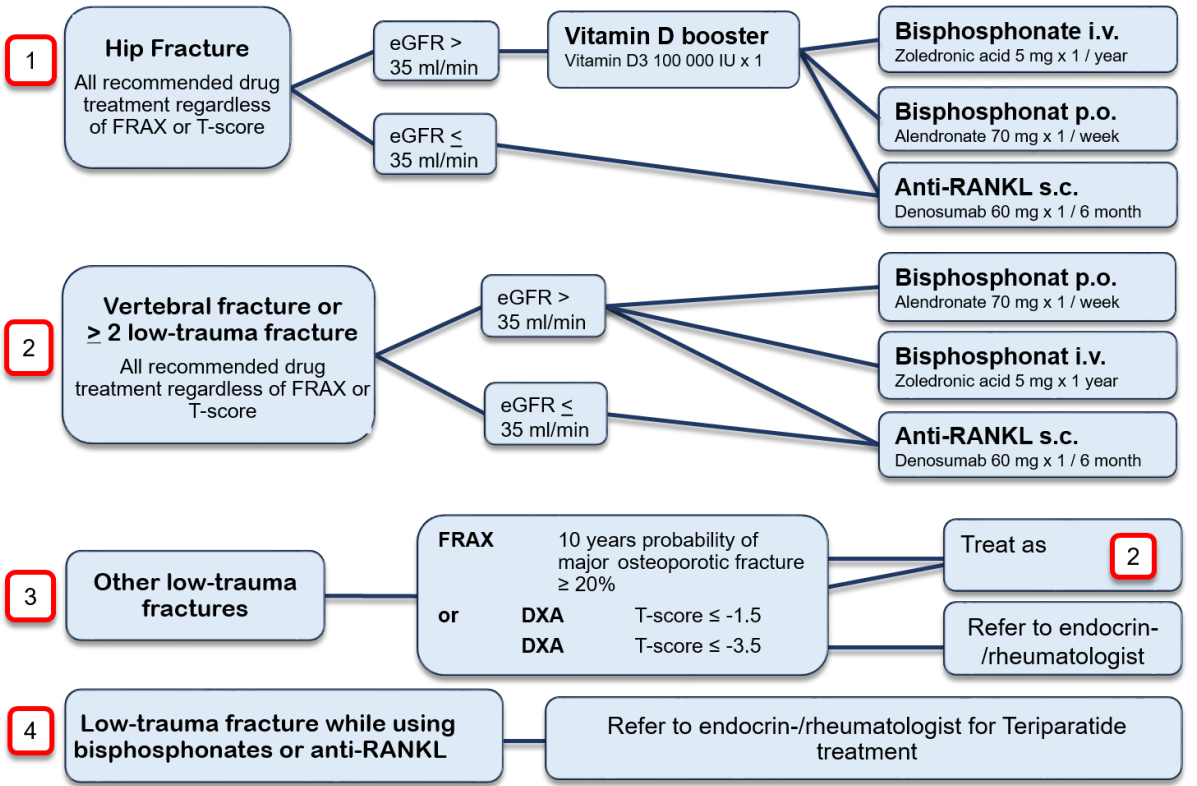

267

\*Patients with dementia, difficulties laying on the back, or short life expectancy will not be offered DXA and FRAX score can be assessed without BMD. At hospitals without DXA, FRAX score can be assessed without BMD (FRAX available: <http://www.shef.ac.uk/FRAX/tool.aspx?country=42>)

268 **Standardized Intervention Program was initiated from May 2015 (Fig. 2 above)**

269 **Data from nationwide registers**

270 Data from national registries will be collected from 1 January 2008 to 31 December 2019.

271 **Norwegian Patient Register:** Data on fractures 2008-2019 treated in Norwegian hospitals will be  
272 retrieved from the National Patient Registry (NPR) *Charlson comorbidity score* –will be calculated  
273 based on all available diagnosis codes before a registered event. All hospital admissions after  
274 fracture will be retrieved, to evaluate total costs for all patients during follow-up.

275 **Population register:** Dates of death and migration, marital status and country of birth for all  
276 fracture patients will be obtained from the National Population Registry 2008-2019.

277 **Statistics Norway:** Information on education level in four categories is registered on the entire  
278 population of Norway and will be used as proxy for social class.

279 **Control and reimbursement of healthcare claims (KUHR):** Hip fractures are always treated in  
280 hospitals. However, patients with other types of fractures might seek private clinics, primary  
281 physicians or private x-ray institutes when they fracture. This type of information is available in  
282 KUHR. In order to make sure that information on fractures treated outside hospitals is not missed,  
283 we want to include KUHR-data. The ICPC-2 diagnosis codes L72-L76 contain relevant information  
284 on fractures (Fig. 3).

285  
286 **Merging and storing of data:** Data from the Norwegian Patient Register (NPR), the National  
287 Population Registry (from 1 January 2008 to 31 December 2019), and statistics Norway will be  
288 combined (Fig. 3). Regarding fractures of the hip, additional information will also be obtained from  
289 the Cause of Death Register. The University of Oslo (UiO) has implemented a research platform  
290 Services for Sensitive Data (TSD), which meets all requirements in the Norwegian law regarding  
291 safe handling and storing of sensitive data. All data will be stored in TSD.

292  
293 **Statistics**

294 In this stepped-wedge CRT, each of the hospitals will act as their own controls, and provide data  
295 from before and after intervention. In the analyses the effect of introducing the standardized  
296 intervention program will be estimated by comparing data before (2008-2014), and after the  
297 intervention (2015-2018), using stepped wedge CRT methods in STATA. Main outcomes are  
298 recurrent fractures (hip, forearm and all fracture types) and post hip-fracture mortality.

299  
300 Power calculations including the seven hospitals show that we are able to find a relative risk (RR)  
301 of 0.56 for recurrent hip fracture risk in hip fracture patients (assumes inclusion of 56,000 person

302 years 2008-2017, 80% power, 95% confidence intervals, cluster coefficient of variation = 0.3) after  
 303 intervention compared to before. Corresponding power calculations for any recurrent fracture in all  
 304 fracture patients show we can find a RR of 0.76 after intervention compared to before (assumes  
 305 inclusion of 260,000 person years).

306  
 307 We will study incidence of forearm fractures and other low-energy fragility fractures in registers  
 308 prior to the intervention. We can also investigate to what extent there have been different time  
 309 trends in fracture rates in hospitals included in the intervention versus those not included. The  
 310 analyses will be adjusted for individual Charlson comorbidity score, and marital status.

311

| <b>Register</b>                                              | <b>Variable</b>                                                                                                                                          | <b>Concerning type of fractures</b> |
|--------------------------------------------------------------|----------------------------------------------------------------------------------------------------------------------------------------------------------|-------------------------------------|
| <b>Norwegian Patient Register</b>                            | Gender, birth year, hospital, hospitalization dates, municipality of residence, treatment level, surgical procedure codes and Charlson comorbidity index | Fractures treated in hospitals      |
| <b>National Population Register</b>                          | Dates of migration and death, marital status, country of birth                                                                                           | All fractures                       |
| <b>Statistics Norway</b>                                     | Education levels                                                                                                                                         | All fractures                       |
| <b>Control and Reimbursement of Healthcare Claims (KUHR)</b> | ICPC-2 diagnosis codes L72-76 including sub-groups                                                                                                       | Fractures treated in primary care   |

312 *Abbreviations: ICPC-2: International Classification of Primary Care 2 edition*

313 **Fig. 3. The national registers used for outcome assessment in the NoFRACT study.**

314

### 315 **2.3 The project plan, project management, organization and cooperation**

316 The 5 years cross-regional project period will last from May 1, 2015 to April 31, 2020.

317

318 **2015-2018** Coordinating nurses will recruit fracture patients at all seven hospitals, Oslo University  
 319 Hospital (Ullevål), Bærum Hospital, Drammen Hospital, Haukeland University Hospital (Bergen),  
 320 Molde Hospital, St. Olavs University Hospital (Trondheim) and University Hospital of North  
 321 Norway (UNN, Tromsø). All fracture patients will be offered assessment and treatment as outlined  
 322 previously. The dedicated FLS nurses will perform weekly systematic searches of all in-patients  
 323 and out-patients, and approach admitted patients and invite out-patients to participate by letter, SMS

324 and telephone and offer appointment with nurse within 6 weeks. Good routines will be established  
325 together with our international collaborators, who have experience from establishing and  
326 maintaining such projects. The nurses will provide patients with information about bone fragility,  
327 and the impact of their future fracture risk, so they will be well motivated for modifying amendable  
328 lifestyle factors such as; physical activity, healthy diet, with sufficient intake of vitamin D and  
329 calcium, protein, avoid excess alcohol intake and quit smoking. Follow-up appointment with the  
330 nurses after 1 year will be offered for assessment of compliance. A physician will prescribe anti-  
331 osteoporosis drug (AOD) for those who need it and outlined in the treatment algorithm.

332 **2018-2019** Data from registers will be retrieved for the first publications on the incidence of  
333 forearm fractures and other low-energy fragility fractures at different hospitals and regions in  
334 Norway. The PhD student will take the courses they need for the PhD program.

335 **2020** The final papers on the effect of the introduction of the standardized program will be written  
336 by the PhD student and researchers. In 2021 the PhD student will defend their theses.  
337

### 338 **Research Team**

339 The research team has all the qualifications and resources needed to complete the study including  
340 equipment, methods and infrastructure, regional, national and international collaborators. Treatment  
341 of fracture patients will be coordinated across specialities, as the team includes orthopedic surgeons,  
342 endocrinologist, epidemiologists and rheumatologists with longstanding experience in treatment of  
343 patients with fractures and/or osteoporosis; some are world capacities in the field. This  
344 collaboration will promote national and international network building. The international  
345 cooperation will ensure that the intervention will be well planned, organized and executed.  
346 Initiatives are taken at seven hospitals, particular from the Norwegian Orthopedic Surgeon Society  
347 of Osteoporosis and Bone Health (FOB), and four universities with a range of experts involved:  
348

349 **Oslo University Hospital**, Prof. Lars Nordsletten, orthopedic surgeon (Ullevål), Frede Frihagen,  
350 PhD, orthopedic surgeon, Prof. Erik Fink Eriksen, endocrinologist, Ruth Aga, MD, Ida Lund, MD,  
351 (Legevakten), Ass Prof. Torbjørn Wisløff, statistician and health economist, Anne Kristine Brekke,  
352 Sissel Knuts, Elise Berg Vesterhus, Janne Blegen Høglund, Ingvild Hestnes, Herdis Palmadottir,  
353 Malte Smidt, Janicke Rudie, Karine R Haugvad, Ellen Johansson, Mette Bentsdal Larsen, nurses.

354 **University of Oslo**, Tone K Omsland, PhD, epidemiologist, Cecilie Dahl, PhD, postdoctor.

355 **Bærum Hospital**, Wender Figved, PhD, orthopedic surgeon, Ellen Tverå Langslet, orthopedic  
356 surgeon, Katrine A Askevold, Hildegunn Berger, Merete Finjar, nurse.

357 **Drammen Hospital**, Tove Tveitan Borgen, rheumatologist, key contact person, Lars Michael  
358 Hubschle, orthopedic surgeon, Hanne Louise Hoelstad and May-Britt Stenbro are nurses.

359 **Bergen, Haukeland University Hospital**, Jan-Erik Gjertsen, PhD, orthopedic surgeon, Ellen  
360 Apalset, rheumatologist, PhD, 2 nurses will be recruited as coordinators.

361 **Molde Hospital**, Lene B Solberg, PhD, orthopedic resident, Jens Stutzer, orthopedic surgeon,  
362 Charlotte Råmkes and Solveig Solberg, nurses.

363 **Trondheim, St. Olavs University Hospital**, Trude Basso, PhD, orthopedic resident, Lars Gunnar  
364 Johnsen, PhD, orthopaedic surgeon, Prof Unni Syversen, endocrinologist, Mari Hoff, PhD,  
365 rheumatologist, Sølvi Liabakk, physiotherapist, Nina Raaness Larsen, Kristine Aavik Haugen, Gry  
366 Mette Torstensen and Hilde Kjøsnes Thoresen, nurses.

367 **Norwegian University of Science and Technology**, Gunhild Hagen PhD student, health economist  
368 **Tromsø, University Hospital of North Norway (UNN)**, Åshild Bjørnerem, PhD, gynecologist,  
369 Prof. Ragnar Joakimsen, endocrinologist, Marit Osima, MD, PhD student, Camilla Andreasen, PhD  
370 student, Jan Elvenes, PhD, Karl-Ivar Lorentzen, all orthopaedic surgeons, and Anita Kanninen.  
371 May Greta Pedersen, nurses.

372  
373 **Steering Committee:** Åshild Bjørnerem (project chair), Lene B Solberg (project coordinator),  
374 May-Britt Stenbro (coordinator of the project nurses), Lars Nordsletten (responsible for the budget  
375 which is located at OUS, Oslo), Tone K Omsland (responsible for data management), Trude Basso  
376 (responsible for the project web site), Frede Frihagen, Tove T Borgen, Wender Figved, Erik F  
377 Eriksen, Unni Syversen, Ellen Apalset, Cecilie Dahl and Ida Lund.

378  
379 **International collaborators**  
380 David Marsh, orthopaedic surgeon, UK, president Fragility Fracture Network, Kristina Åkesson,  
381 orthopaedic surgeon, Sweden, leader FLS development IOF, Stephen Gallacher, endocrinologist,  
382 Glasgow, FLS researcher and clinician, Henrik Palm, orthopaedic surgeon, Denmark, FLS  
383 researcher. They have co-authored the project application, and will advise on introduction of FLS.

384  
385 **2.4 Total budget for this project** This is outlined in the application form.

386  
387 **3. Key perspectives and compliance with strategic documents**

### 388 **3.1 Compliance with strategic documents**

389 This cross-regional cooperative project will strengthen service-relevant, patient-oriented clinical  
390 research and health services research within the priority area of musculoskeletal disorders as  
391 *specifically requested in the call for proposals*. A national research team is established across  
392 hospitals and universities. This project will generate new knowledge, increase competency, enhance  
393 quality and develop the health services delivered by hospitals for secondary fracture prevention. We

394 expect this research to provide a basis for ensuring high-quality, safe and effective services for the  
395 many fracture patients. The evidence from this project will be used to develop national guidelines  
396 for secondary fracture prevention to break the fragility fracture cycle and improve patient care.  
397

### 398 **3.2 Relevance and benefit to society**

399 Bone fragility is currently largely ignored by treating physicians, both specialists and general  
400 practitioners. This project is a unique possibility to test the hypothesis that a new standardized  
401 program for bone fragility assessment and treatment will prevent secondary fractures and reduce  
402 mortality rates in both genders. We believe this will be useful to establish a clinical management  
403 strategy, to correctly target treatment to individuals who need it, to reduce the burden of bone  
404 fragility in the society, and promote bone health and life quality by advancing age. We wish  
405 through this research to contribute to increased understanding of the importance of bone fragility,  
406 and offer assessment and treatment to those who need it, and help focus on osteoporosis.

407

408 **3.3 Environmental impact** No environmental impact expected as a result of this project.

409

### 410 **3.4 Ethical perspectives**

411 Approval by the ethics committee has been achieved for linkage of data from national registers for  
412 the main study, with exemption from obtaining of consent (REK 2015/334 for the period 2015-  
413 2025). We will apply for access of the data from each of the national registers. The linkage of the  
414 register data will be performed by NPR, who will provide us with anonymous data that will be  
415 stored safely at TSD, at the University of Oslo (see method section).

416

### 417 **3.5 Gender issues (Recruitment of women, gender balance and gender perspectives)**

418 Of fracture patients 2/3 are women and 1/3 men, but men have higher mortality after a hip fracture.  
419 The nurses at each hospital will approach patients of both genders. Analyses will be gender  
420 stratified, and women and men will be compared. Moreover, the project will promote the Research  
421 Council's general objectives to increase recruitment of female collaborators and improve gender  
422 balance in projects, to obtain an equal gender distribution.

423

## 424 **4. Dissemination and communication of results**

### 425 **4.1 Dissemination plan**

426 The scientific results will be presented and published in peer-review national journals and highly  
427 renowned international journals and at local, national and international meetings. The results will  
428 also be presented for the public in local meetings, through media and in cooperation with patient

429 organisations. Authorship for the various scientific papers will be according to the Vancouver  
430 protocol. If in doubt about authorship, the project steering committee will decide.

#### 431 **4.2 Communication with users**

432 All patients will be informed about the importance of bone fragility and advised about treatment if  
433 needed in a face-to-face setting by the coordinating nurses at each of the study sites. All information  
434 important to the participant's health and results of this research will be made available for the  
435 participants. The nurses and physicians involved in this project will educate patients, staff members  
436 and the general population, present results from successful FLS models in other countries, for  
437 prevention of secondary fractures and explain the importance of the current research project.

438

439



## 440 References

- 441 (1) Cummings SR, Melton LJ. Epidemiology and outcomes of osteoporotic fractures. *Lancet* 2002;359(9319):1761-7.
- 442 (2) Lofthus CM, Osnes EK, Falch JA, et al. Epidemiology of hip fractures in Oslo, Norway. *Bone* 2001;29(5):413-8.
- 443 (3) Seeman E. Unmet needs in fracture prevention: new European guidelines for the investigation and registration of therapeutic  
444 agents. *Osteoporos Int* 2007;18(5):569-73.
- 445 (4) Hernlund E, Svedbom A, Ivergard M, et al. Osteoporosis in the European Union: medical management, epidemiology and  
446 economic burden. A report prepared in collaboration with the International Osteoporosis Foundation (IOF) and the European  
447 Federation of Pharmaceutical Industry Associations (EFPIA). *Arch Osteoporos* 2013;8(1-2):136.
- 448 (5) Omsland TK, Magnus JH. Forecasting the burden of future postmenopausal hip fractures. *Osteoporos Int* 2014.
- 449 (6) Kanis JA, Johnell O, Oden A, et al. Long-term risk of osteoporotic fracture in Malmo. *Osteoporos Int* 2000;11(8):669-74.
- 450 (7) Kanis JA, Burlet N, Cooper C, et al. European guidance for the diagnosis and management of osteoporosis in postmenopausal  
451 women. *Osteoporos Int* 2008;19(4):399-428.
- 452 (8) Kanis JA, Oden A, Johnell O, et al. The components of excess mortality after hip fracture. *Bone* 200;32(5):468-73.
- 453 (9) Johnell O, Kanis JA, Jonsson B, et al. The burden of hospitalised fractures in Sweden. *Osteoporos Int* 2005;16(2):222-8.
- 454 (10) Ensrud KE, Black DM, Palermo L, et al. Treatment with alendronate prevents fractures in women at highest risk: results from the  
455 Fracture Intervention Trial. *Arch Intern Med* 1997;157(22):2617-24.
- 456 (11) Guyatt GH, Cranney A, Griffith L, et al. Summary of meta-analyses of therapies for postmenopausal osteoporosis and the  
457 relationship between bone density and fractures. *Endocrinol Metab Clin North Am* 2002;31(3):659-79, xii.
- 458 (12) Engesæter LB, Gjertsen JE, Kvinnesland I, Kvamsdal LB. The Norwegian Hip Fracture Register, annual report, The Norwegian  
459 Arthroplasty Register. 2014.
- 460 (13) Omsland TK, Holvik K, Meyer HE, et al. Hip fractures in Norway 1999-2008: time trends in total incidence and second hip  
461 fracture rates: a NOREPOS study. *Eur J Epidemiol* 2012;27(10):807-14.
- 462 (14) The Norwegian Institute of Public Health. Osteoporosis and fractures in Norway - fact sheet. 2014.
- 463 (15) Lofthus CM, Frihagen F, Meyer HE, et al. Epidemiology of distal forearm fractures in Oslo, Norway. *Osteoporos Int*  
464 2008;19(6):781-6.
- 465 (16) Johnell O, Kanis JA. An estimate of the worldwide prevalence and disability associated with osteoporotic fractures. *Osteoporos*  
466 *Int* 2006;17(12):1726-33.
- 467 (17) Faksvåg HL. Kostnader ved hoftebrudd hos eldre. Rapport 2014. 2014(ISSN 1892-968). 2014.
- 468 (18) Borgstrom F, Sobocki P, Strom O, Jonsson B. The societal burden of osteoporosis in Sweden. *Bone* 2007;40(6):1602-9.
- 469 (19) Seeman E. Pathogenesis of bone fragility in women and men. *Lancet* 2002;359(9320):1841-50.
- 470 (20) Kannegaard PN, van der Mark S, Eiken P, Abrahamsen B. Excess mortality in men compared with women following a hip  
471 fracture. National analysis of comedications, comorbidity and survival. *Age Ageing* 2010;39(2):203-9.
- 472 (21) Omsland TK, Emaus N, Tell GS, et al. Mortality following the first hip fracture in Norwegian women and men (1999-2008). A  
473 NOREPOS study. *Bone* 2014;63:81-6.
- 474 (22) Seeman E, Delmas PD. Bone quality-the material and structural basis of bone strength and fragility. *NEJM* 2006;354:2250-61.
- 475 (23) Siris ES, Miller PD, Barrett-Connor E, et al. Identification and fracture outcomes of undiagnosed low bone mineral density in  
476 postmenopausal women: results from the National Osteoporosis Risk Assessment. *JAMA* 2001;286(22):2815-22.
- 477 (24) Schuit SC, van der KM, Weel AE, et al. Fracture incidence and association with bone mineral density in elderly men and women:  
478 the Rotterdam Study. *Bone* 2004;34(1):195-202.
- 479 (25) Kanis JA, Johnell O, Oden A, Johansson H, McCloskey E. FRAX and the assessment of fracture probability in men and women  
480 from the UK. *Osteoporos Int* 2008;19(4):385-97.
- 481 (26) Johansson H, Kanis JA, Oden A, Johnell O, McCloskey E. BMD, clinical risk factors and their combination for hip fracture  
482 prevention. *Osteoporos Int* 2009;20(10):1675-82.
- 483 (27) Leslie WD, Brennan SL, Lix LM, et al. Direct comparison of eight national FRAX(R) tools for fracture prediction and treatment

- 484 qualification in Canadian women. *Arch Osteoporos* 2013;8(1-2):145.
- 485 (28) Nguyen ND, Frost SA, Center JR, Eisman JA, Nguyen TV. Development of prognostic nomograms for individualizing 5-year  
486 and 10-year fracture risks. *Osteoporos Int* 2008;19(10):1431-44.
- 487 (29) Gehlbach S, Saag KG, Adachi JD, Hooven FH, Flahive J, Boonen S, et al. Previous fractures at multiple sites increase the risk  
488 for subsequent fractures: the Global Longitudinal Study of Osteoporosis in Women. *J Bone Miner Res* 2012;27(3):645-53.
- 489 (30) Omsland TK, Emaus N, Tell GS, et al. Ten-year risk of second hip fracture. A NOREPOS study. *Bone* 2013;52(1):493-7.
- 490 (31) Devold HM, Sogaard AJ, Tverdal A, Falch JA, Furu K, Meyer HE. Hip fracture and other predictors of anti-osteoporosis drug  
491 use in Norway. *Osteoporos Int* 2013;24(4):1225-33.
- 492 (32) Stoen RO, Nordstletten L, Meyer HE, Frihagen JF, Falch JA, Lofthus CM. Hip fracture incidence is decreasing in the high  
493 incidence area of Oslo, Norway. *Osteoporos Int* 2012;23(10):2527-34.
- 494 (33) Marsh D, Akesson K, Beaton DE, Bogoch ER, Boonen S, Brandi ML, et al. Coordinator-based systems for secondary prevention  
495 in fragility fracture patients. *Osteoporos Int* 2011;22(7):2051-65.
- 496 (34) McLellan AR, Wolowacz SE, Zimovetz EA, et al. Fracture liaison services for the evaluation and management of patients with  
497 osteoporotic fracture: a cost-effectiveness evaluation based on data collected over 8 years of service provision. *Osteoporos Int*  
498 2011;22(7):2083-98.
- 499 (35) Dell R, Greene D, Schelkun SR, Williams K. Osteoporosis disease management: the role of the orthopaedic surgeon. *J Bone*  
500 *Joint Surg Am* 2008;90 Suppl 4:188-94.
- 501 (36) van Helden S, Cauberg E, Geusens P, Winkes B, van der Weijden T, Brink P. The fracture and osteoporosis outpatient clinic: an  
502 effective strategy for improving implementation of an osteoporosis guideline. *J Eval Clin Pract* 2007;13(5):801-5
- 503 (37) Lih A, Nandapalan H, Kim M, Yap C, Lee P, Ganda K, Seibel MJ. Targeted intervention reduces refracture rates in patients with  
504 incident non-vertebral osteoporotic fractures: a 4-year prospective controlled study. *Osteoporos Int*. 2011;22(3):849-58.
- 505 (38) Astrand J, Thorngren KG, Tagil M, Akesson K. 3-year follow-up of 215 fracture patients from a prospective and consecutive  
506 osteoporosis screening program. *Fracture patients care! Acta Orthop* 2008;79(3):404-9.
- 507 (39) Astrand J, Nilsson J, Thorngren KG. Screening for osteoporosis reduced new fracture incidence by almost half: a 6-year follow-  
508 up of 592 fracture patients from an osteoporosis screening program. *Acta Orthop* 2012;83(6):661-5.
- 509 (40) Haugen AS, Søfteland E, Almeland SK, Sevdalis N, Vonen B et al. Effect of the World Health Organization Checklist on Patient  
510 Outcomes: A Stepped Wedge Cluster Randomized Controlled Trial. *Ann Surg*. 2014. [Epub ahead of print]
- 511 (41) Mdege ND, Man MS, Taylor Nee Brown CA, Torgerson DJ. Systematic review of stepped wedge cluster randomized trials  
512 shows that design is particularly used to evaluate interventions during routine implementation. *J Clin Epidemiol*. 2011;64(9):936-48.
