# Supplementary material for: Effect of a Fracture Liaison Service on the Rate of Subsequent Fracture Among Patients With a Fragility Fracture in the Norwegian Capture the Fracture Initiative (NoFRACT): A Trial Protocol
Source: PubMed Central journal article supplement (PMC6324344; doi:10.1001/jamanetworkopen.2018.5701), 2018-12-07
Supplement: jamanetwopen-1-e185701-s002.pdf [file jamanetwopen-1-e185701-s002.pdf]

## Data Sharing Statement

Andreasen. Effect of a Fracture Liaison Service on the Rate of Subsequent Fracture Among Patients With a Fragility Fracture in the Norwegian Capture the Fracture Initiative (NoFRACT). *JAMA Netw Open*. Published December 07, 2018.  
10.1001/jamanetworkopen.2018.5701

### Data

**Data available:** No

### Additional Information

**Explanation for why data not available:** Due to strict protection of privacy under Norwegian law, individual level datasets can only be shared if approved by The Regional Committees for Medical and Health Research Ethics .
